# Supplementary material for: Early response and pathological complete remission in Breast Cancer with different molecular subtypes: a retrospective single center analysis
Source: PubMed Central journal article supplement (PMC7591996; doi:10.7150/jca.46805), 2020-10-06
Supplement: jcav11p6916s1.pdf [file jcav11p6916s1.pdf]

**Table S1. Comparison of 5-year DFS and OS between responders and non-responders according to pathological response.**

| <b>Pathological response</b> | <b>Clinical response</b> | <b>5-year DFS</b> | <b>P-value</b> | <b>5-year OS</b> | <b>P-value</b> |
|------------------------------|--------------------------|-------------------|----------------|------------------|----------------|
| pCR                          | Responders               | 89.6%             | 0.244          | 93.3%            | 0.405          |
|                              | Non-responders           | 81.2%             |                | 83.7%            |                |
| Non-pCR                      | Responders               | 60.9%             | 0.437          | 74.0%            | 0.090          |
|                              | Non-responders           | 62.5%             |                | 84.2%            |                |

Abbreviation: *pCR* pathological complete response, *DFS* disease free survival, *OS* overall survival, *NAT* neoadjuvant treatment.

**Table S2. Comparison of 5-year DFS and OS between patients with pCR and non pCR after NAT according to clinical early response.**

| <b>Clinical response</b> | <b>Pathological response</b> | <b>5-year DFS</b> | <b>P-value</b> | <b>5-year OS</b> | <b>P-value</b> |
|--------------------------|------------------------------|-------------------|----------------|------------------|----------------|
| Responders               | pCR                          | 89.6%             | 0.0008         | 93.3%            | 0.010          |
|                          | Non-pCR                      | 60.9%             |                | 74.0%            |                |
| Non-responders           | pCR                          | 81.2%             | 0.066          | 83.7%            | 0.521          |
|                          | Non-pCR                      | 62.5%             |                | 84.2%            |                |

Abbreviation: *pCR* pathological complete response, *DFS* disease free survival, *OS* overall survival, *NAT* neoadjuvant treatment.

**Table S3 Comparison of the pCR rates in breast among different molecular subtypes.**

| <b>Molecular subtypes</b> | <b>Luminal (HER2-)</b> | <b>Luminal (HER2+)</b> | <b>HER2 overexpression</b> | <b>TNBC</b> | <b>P-value</b>   |
|---------------------------|------------------------|------------------------|----------------------------|-------------|------------------|
| <b>Total</b>              | 14.5%                  | 18.9%                  | 54.0%                      | 36.5%       | <b>&lt;0.001</b> |
| <b>Responder</b>          | 38.2%                  | 31.3%                  | 88.2%                      | 51.5%       | <b>0.003</b>     |
| <b>Non-responder</b>      | 6.7%                   | 13.5%                  | 41.3%                      | 24.4%       | <b>&lt;0.001</b> |

Abbreviation: *pCR* pathological complete response, *HER2* human epidermal growth factor receptor-2, *TNBC* triple negative breast cancer.

**Table S4 Overview of studies about early assessment by ultrasound and pathological response in breast cancer patients receiving neoadjuvant therapy.**

| Study(year)              | No. of patient | Breast subtypes | Timing of assessment | Parameter tested     | Response standard | End point        | Sensitivity | Specificity | pCR in responder | pCR in non-responder |
|--------------------------|----------------|-----------------|----------------------|----------------------|-------------------|------------------|-------------|-------------|------------------|----------------------|
| Beresford MJ (2008) [3]  | 200            | NR              | Two cycles           | Bi-dimensional       | ≥50% reduction    | pCR              | 95.2%       | 52.9%       | 21.5%            | 1.2%                 |
| Cosimo SD (2018) [8]     | 340            | HER2 positive   | Two cycles           | The longest diameter | ≥30% reduction    | pCR              | NR          | NR          | 46%              | 23%                  |
| Marinovich ML (2014) [9] | 832            | Whole           | Two cycles           | Bi-dimensional       | ≥50% reduction    | pCR              | 81.7%       | 47.6%       | NR               | NR                   |
| Fernandes J (2019) [10]  | 92             | Whole           | 4 weeks              | Strain elastography  | NR                | pCR              | 85%         | 83%         | NR               | NR                   |
| Lee YJ (2018) [11]       | 41             | NR              | One cycle            | Time-intensity curve | NR                | M-P score 4 or 5 | 77%         | 67%         | NR               | NR                   |
| Wang XG (2016) [2]       | 290            | NR              | Two cycles           | LDC and PC           | ≥50% reduction    | pCR              | 88.1%       | 85.1%       | NR               | NR                   |

|                           |    |    |            |                             |    |                     |       |       |    |    |
|---------------------------|----|----|------------|-----------------------------|----|---------------------|-------|-------|----|----|
| Jing H (2016)<br>[12]     | 62 | NR | Two cycles | Shear wave<br>elastography  | NR | M-P score<br>4 or 5 | 72.9% | 85.7% | NR | NR |
| Sannachi L<br>(2015) [13] | 30 | NR | 4 weeks    | Backscatter<br>parameters   | NR | Response            | 82%   | 100%  | NR | NR |
| Falou O (2013)<br>[14]    | 15 | NR | 4 weeks    | Elastographic<br>parameters | NR | Response            | 100%  | 100%  | NR | NR |

Abbreviations: pCR, pathological complete response; HER2, human epidermal growth factor receptor-2; NR, not reported; M-P, Miller Payne; LDC, the longest diameter change; PC, the largest perpendicular diameter.

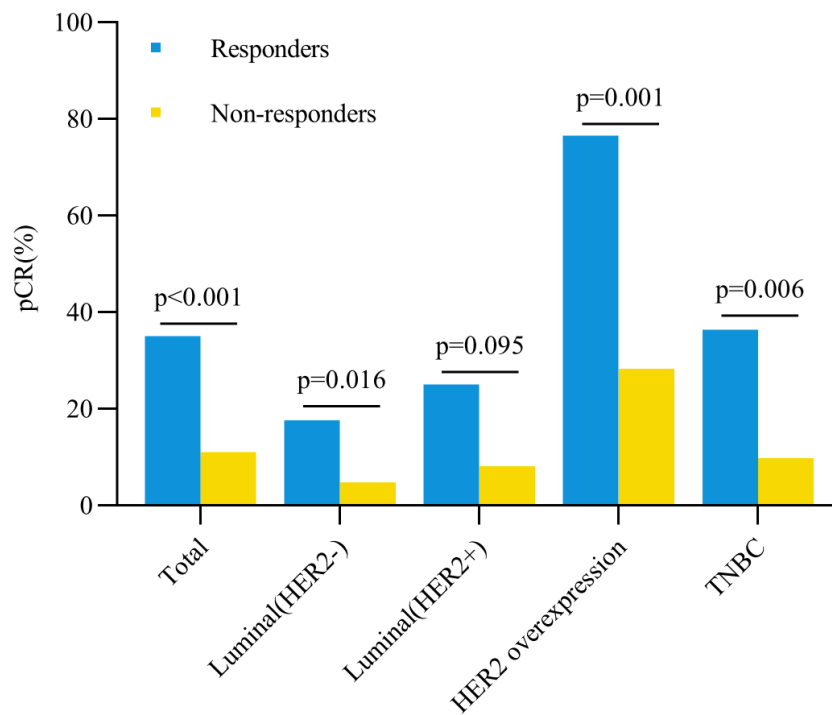

**Figure S1 The pCR rate in Breast and node for clinical responders and non-responders after two cycles of neoadjuvant treatment.**

Abbreviation: *pCR* pathological complete response, *HER2* human epidermal growth factor receptor-2, *TNBC* triple negative breast cancer.

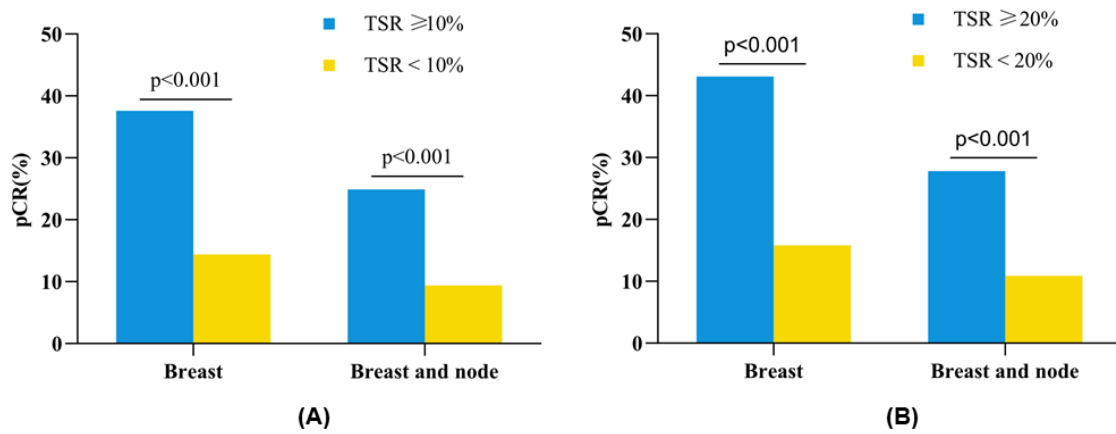

**Figure S2 The pCR rate (Breast) and pCR rate (Breast and node) for patients with TSR  $\geq 10\%$  and TSR  $< 10\%$  (A) and TSR  $\geq 20\%$  and TSR  $< 20\%$  (B) after two cycles of neoadjuvant treatment.**

Abbreviations: *pCR* pathological complete response, *TSR* tumor size reduction.
